# Supplementary material for: External Load Analysis in Beach Handball Using a Local Positioning System and Inertial Measurement Units
Source: Sensors (Basel). 2022 Apr 14;22(8):3011. doi: 10.3390/s22083011 (PMC9026435; doi:10.3390/s22083011)
Supplement: Supplementary file 1 [file sensors-22-03011-s001.zip › sensors-1679162-supplementary.pdf]

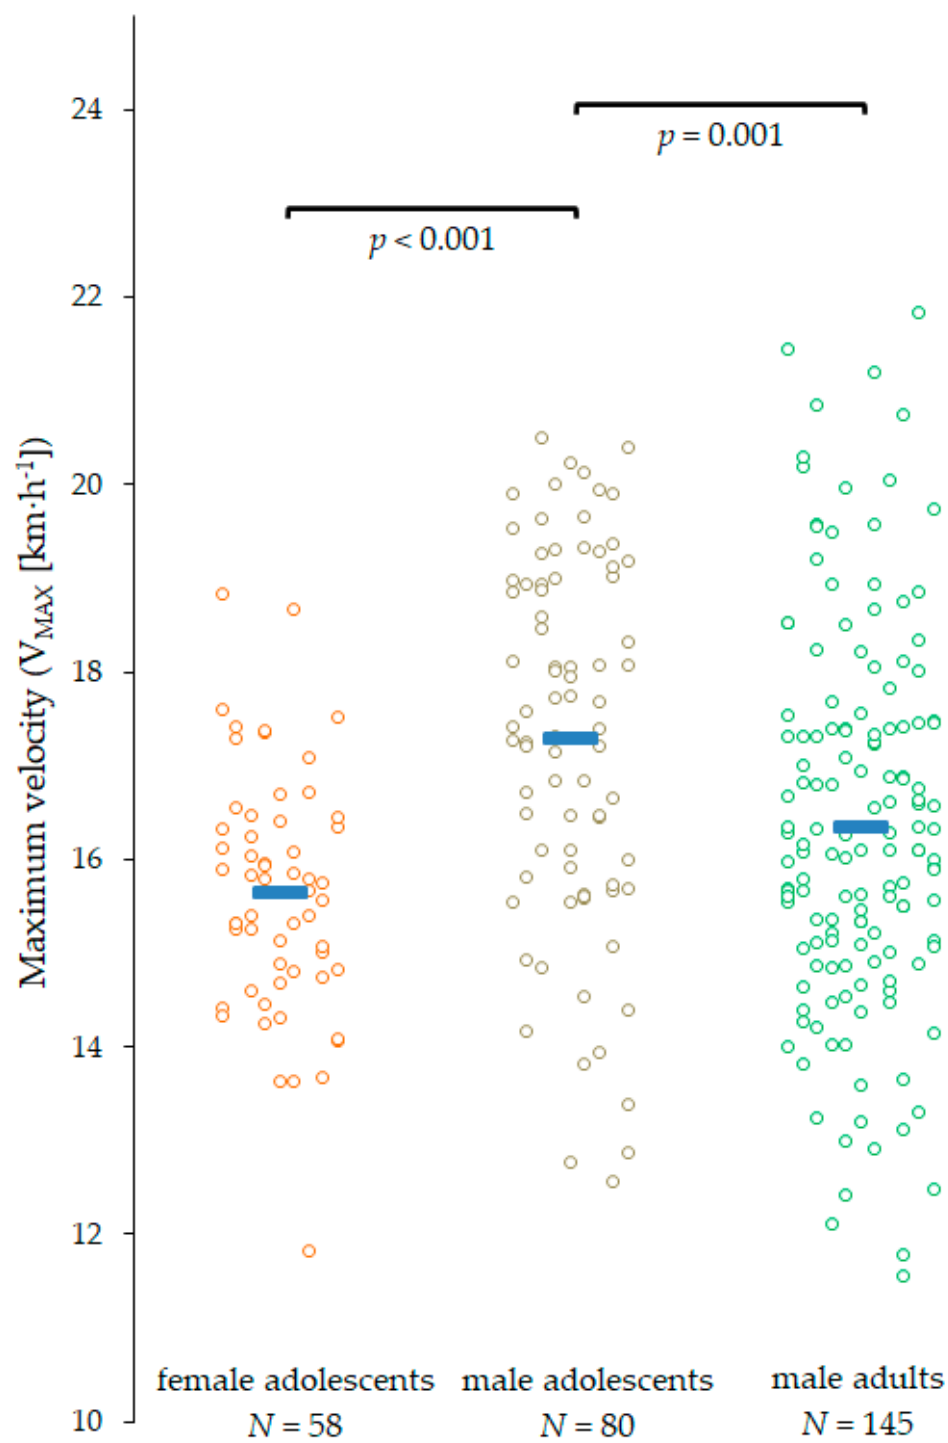

(a)

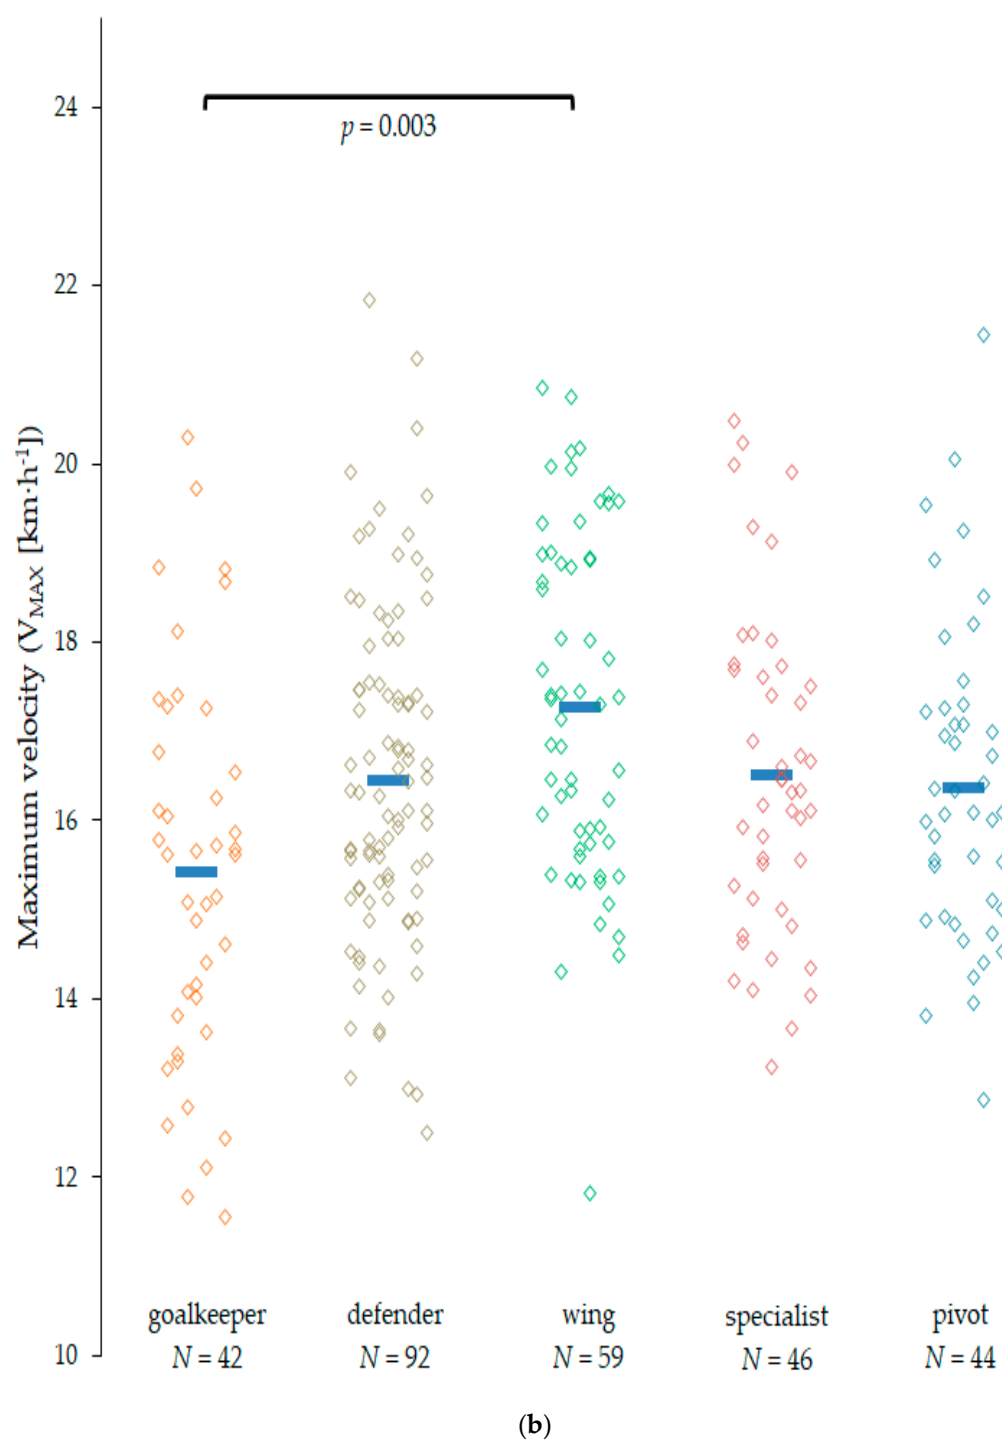

**Figure S1.** Maximum velocity ( $V_{MAX}$  [km·h<sup>-1</sup>]) across the subgroups: (a) subgroup 1 (age/sex); (b) subgroup 2 (playing position).

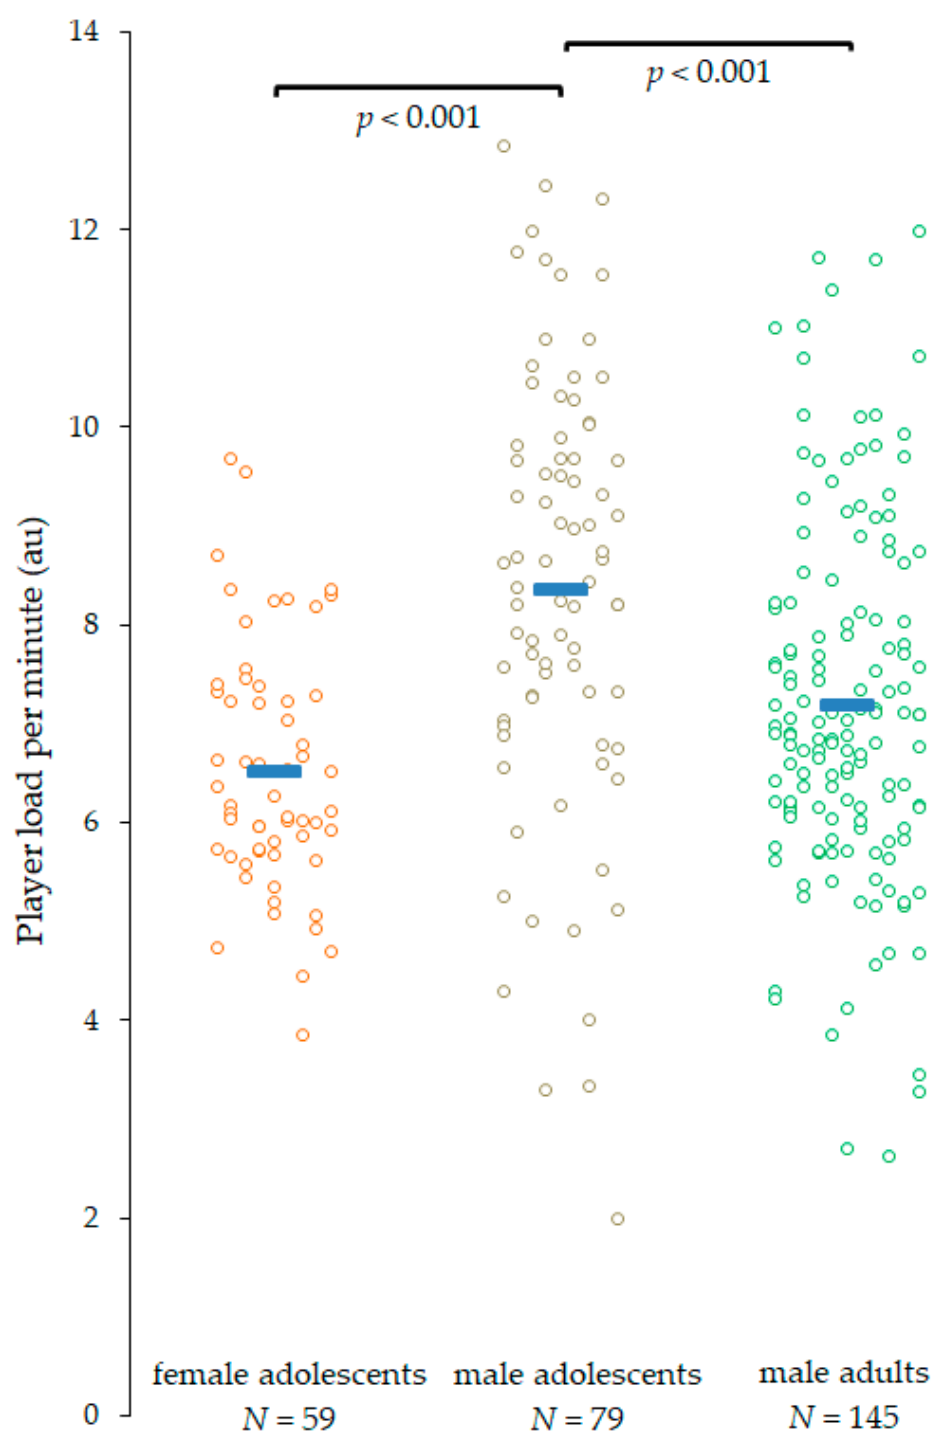

(a)

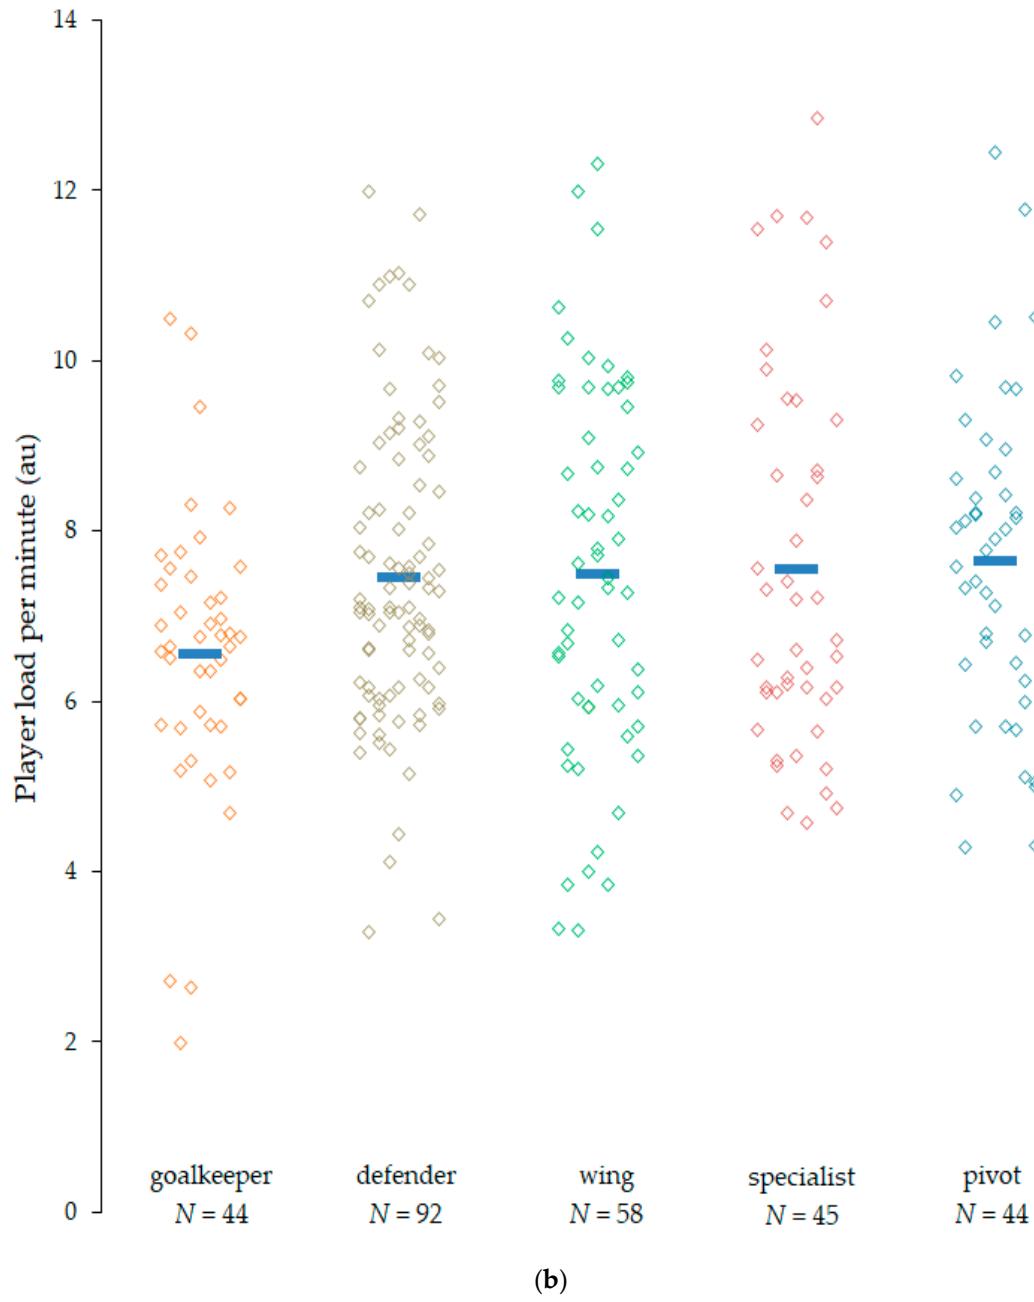

**Figure S2.** Player load per minute (arbitrary unit, au) across the subgroups: (a) subgroup 1 (age/sex); (b) subgroup 2 (playing position).

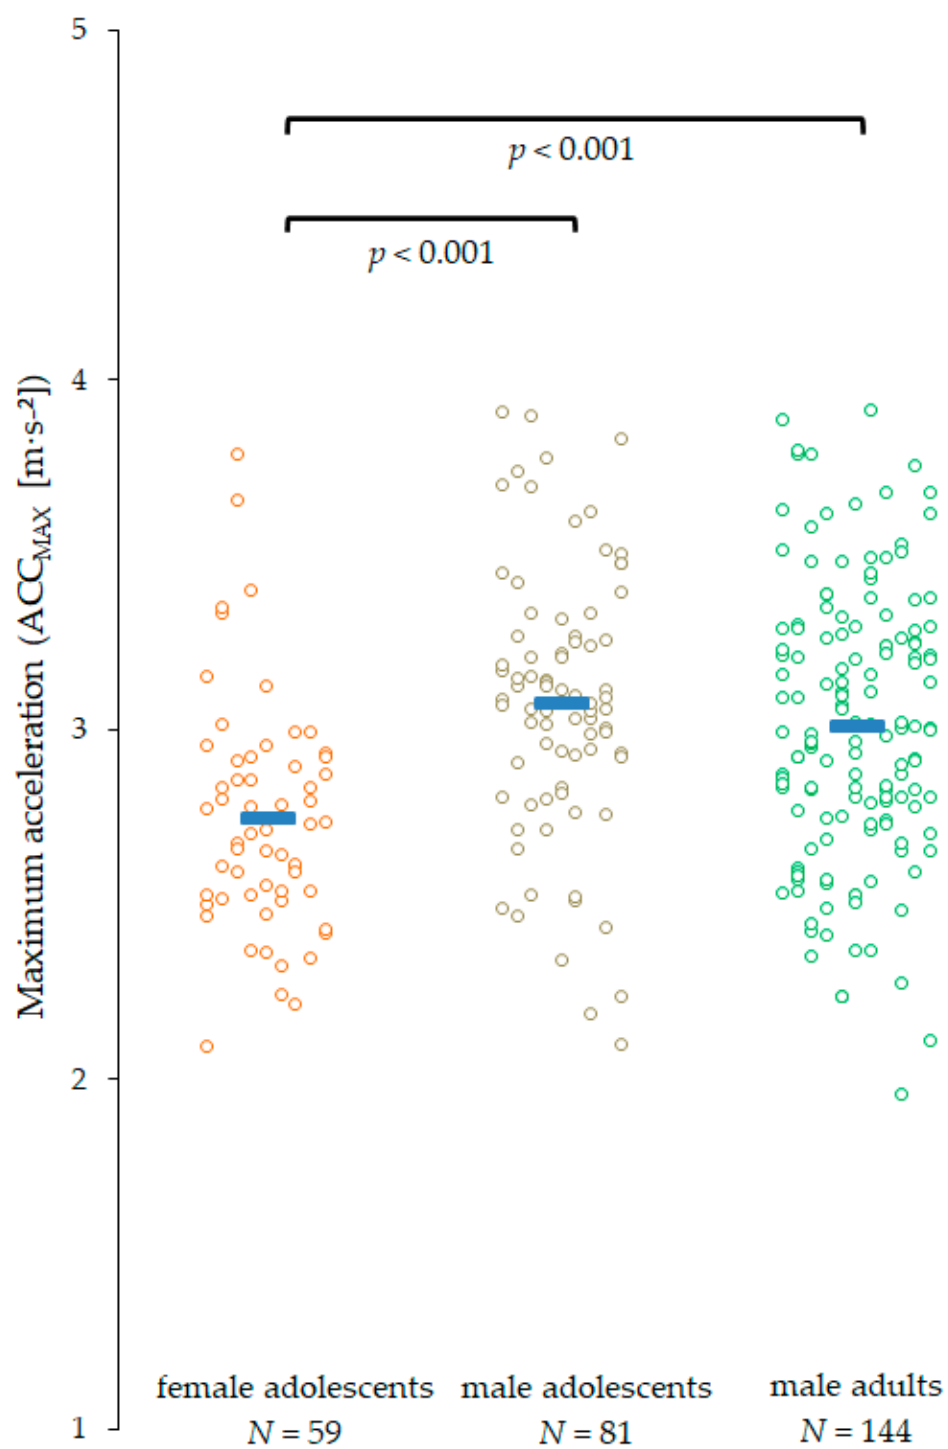

(a)

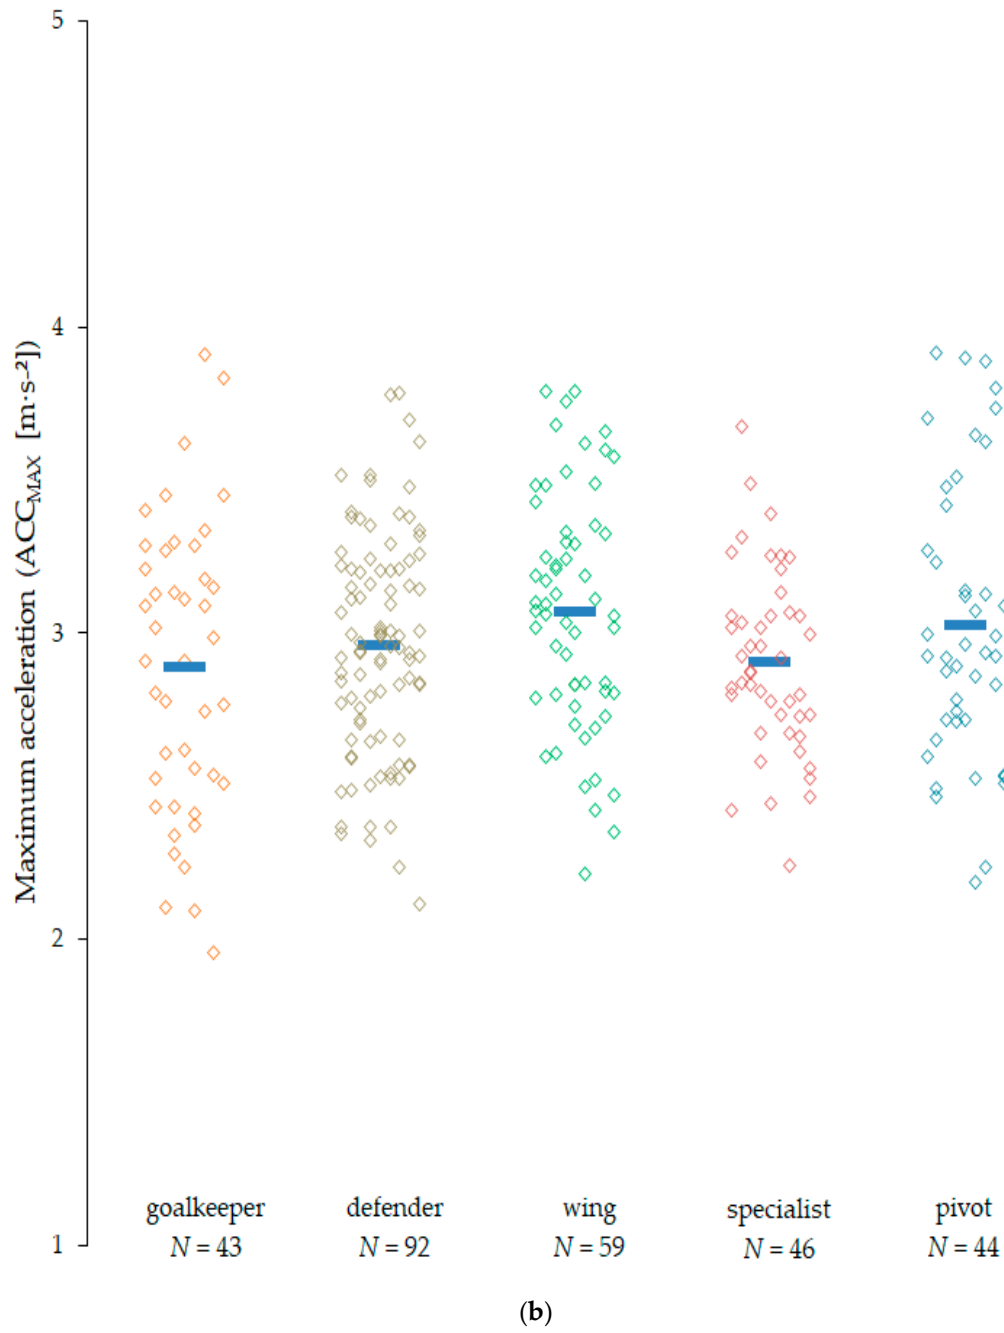

**Figure S3.** Maximum acceleration ( $ACC_{MAX}$  [m·s<sup>-2</sup>]) across the subgroups: (a) subgroup 1 (age/sex); (b) subgroup 2 (playing position).

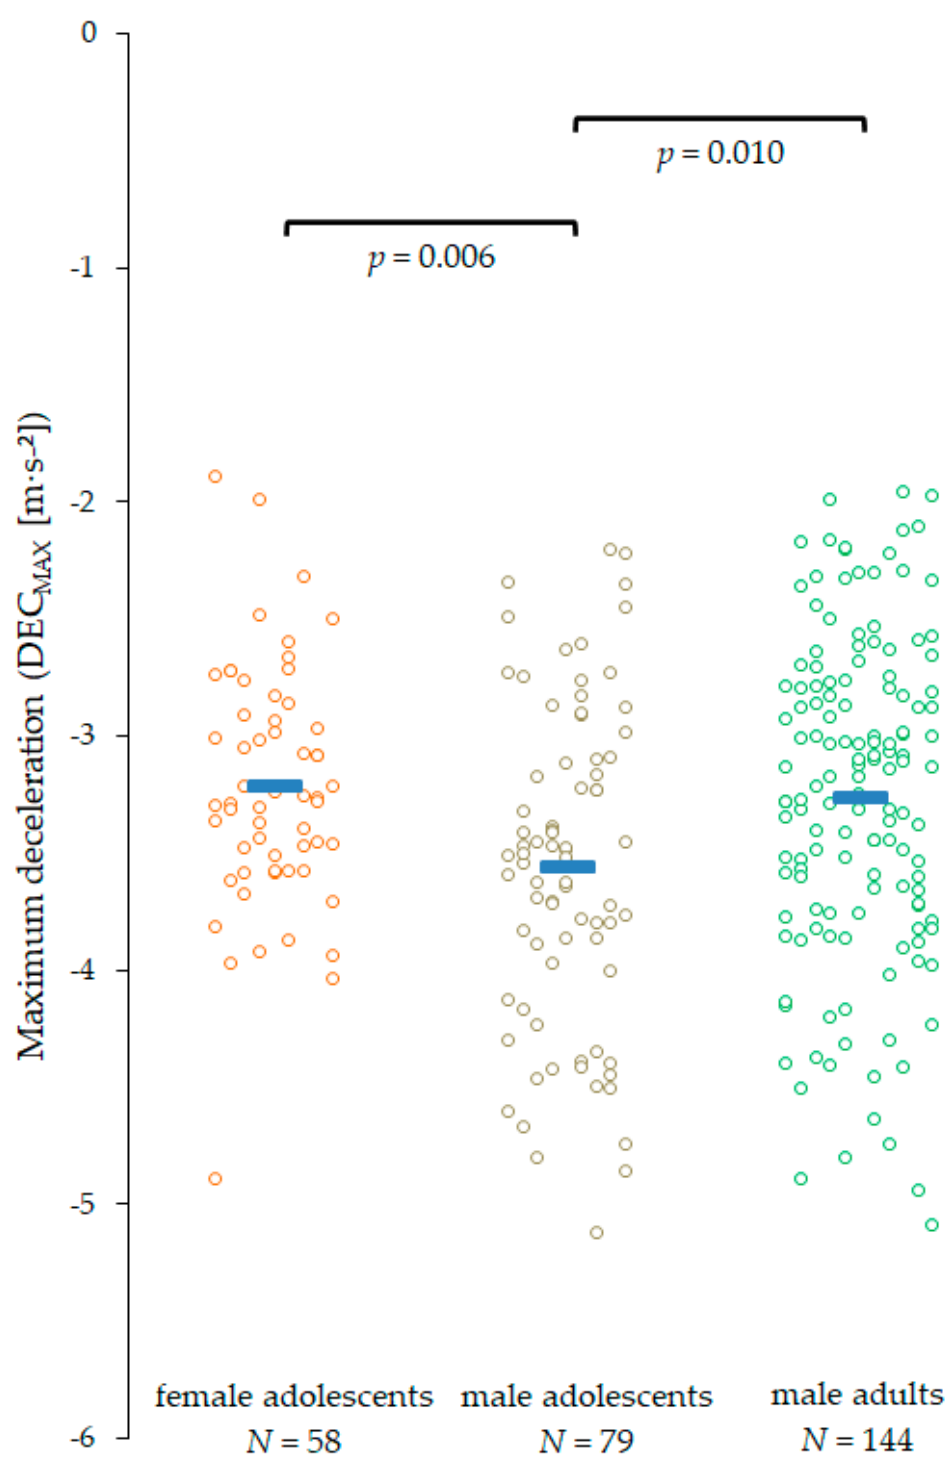

(a)

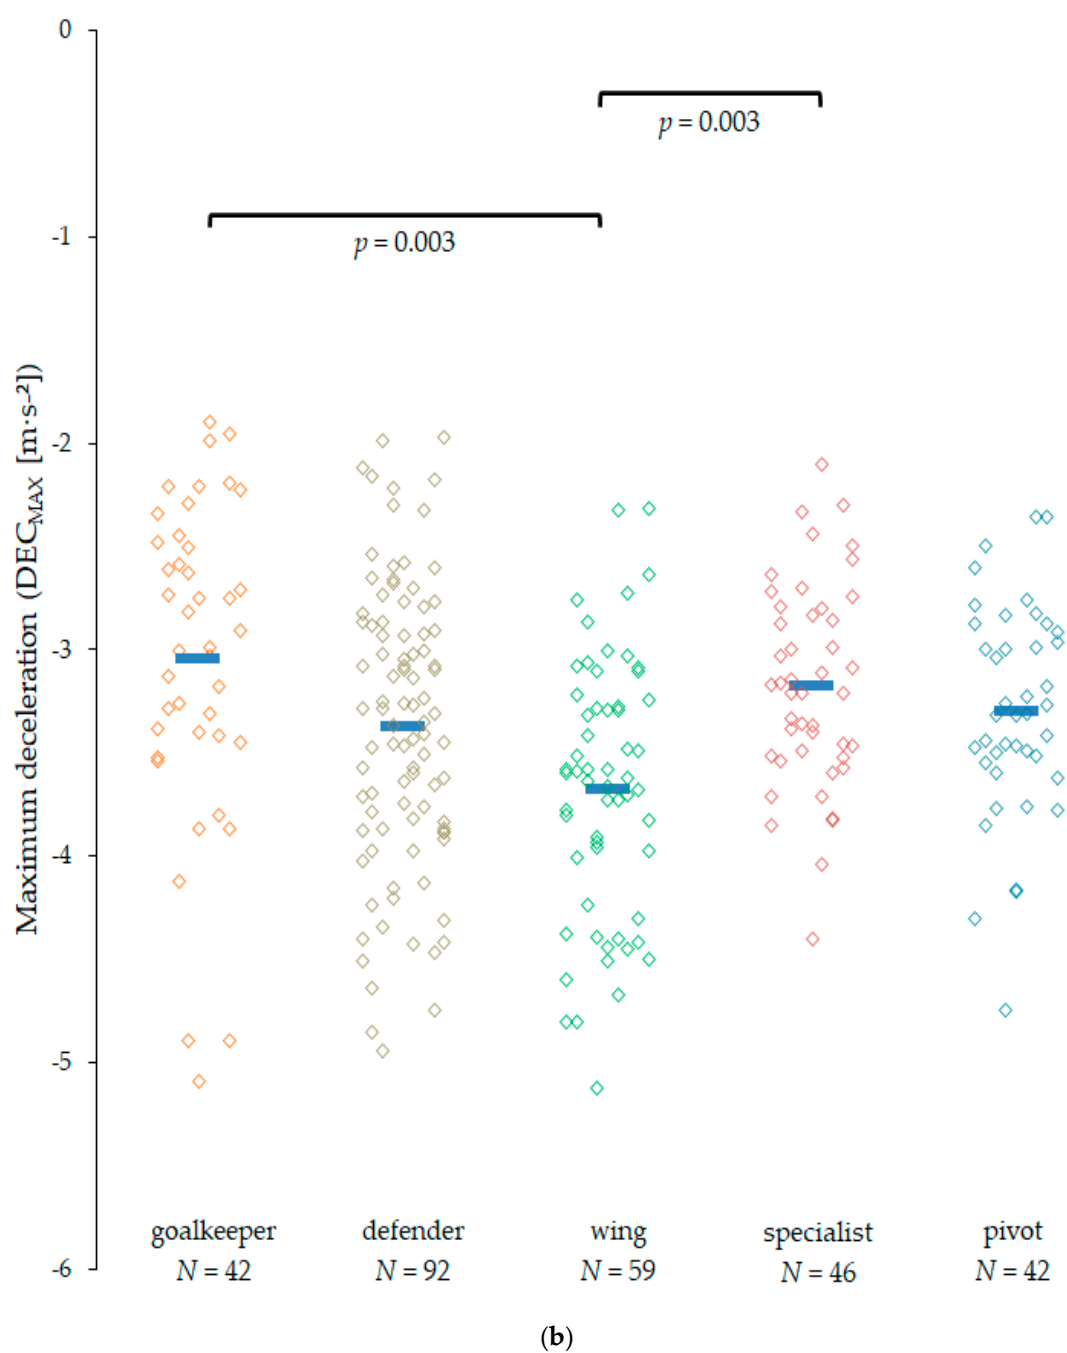

**Figure S4.** Maximum deceleration ( $DEC_{MAX}$  [ $m \cdot s^{-2}$ ]) across the subgroups: (a) subgroup 1 (age/sex); (b) subgroup 2 (playing position).

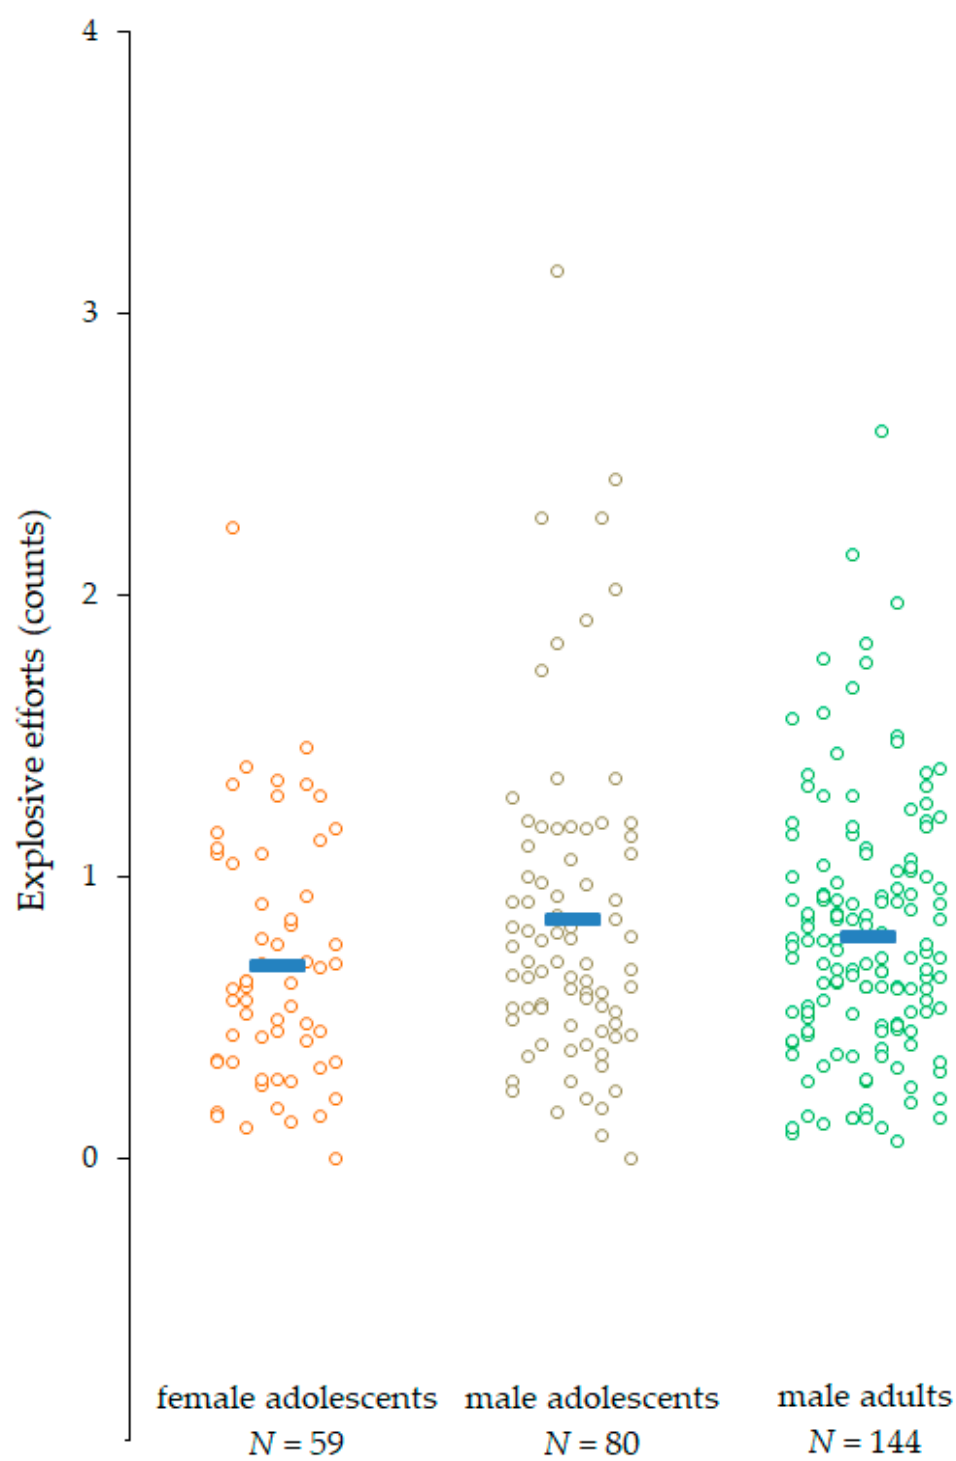

(a)

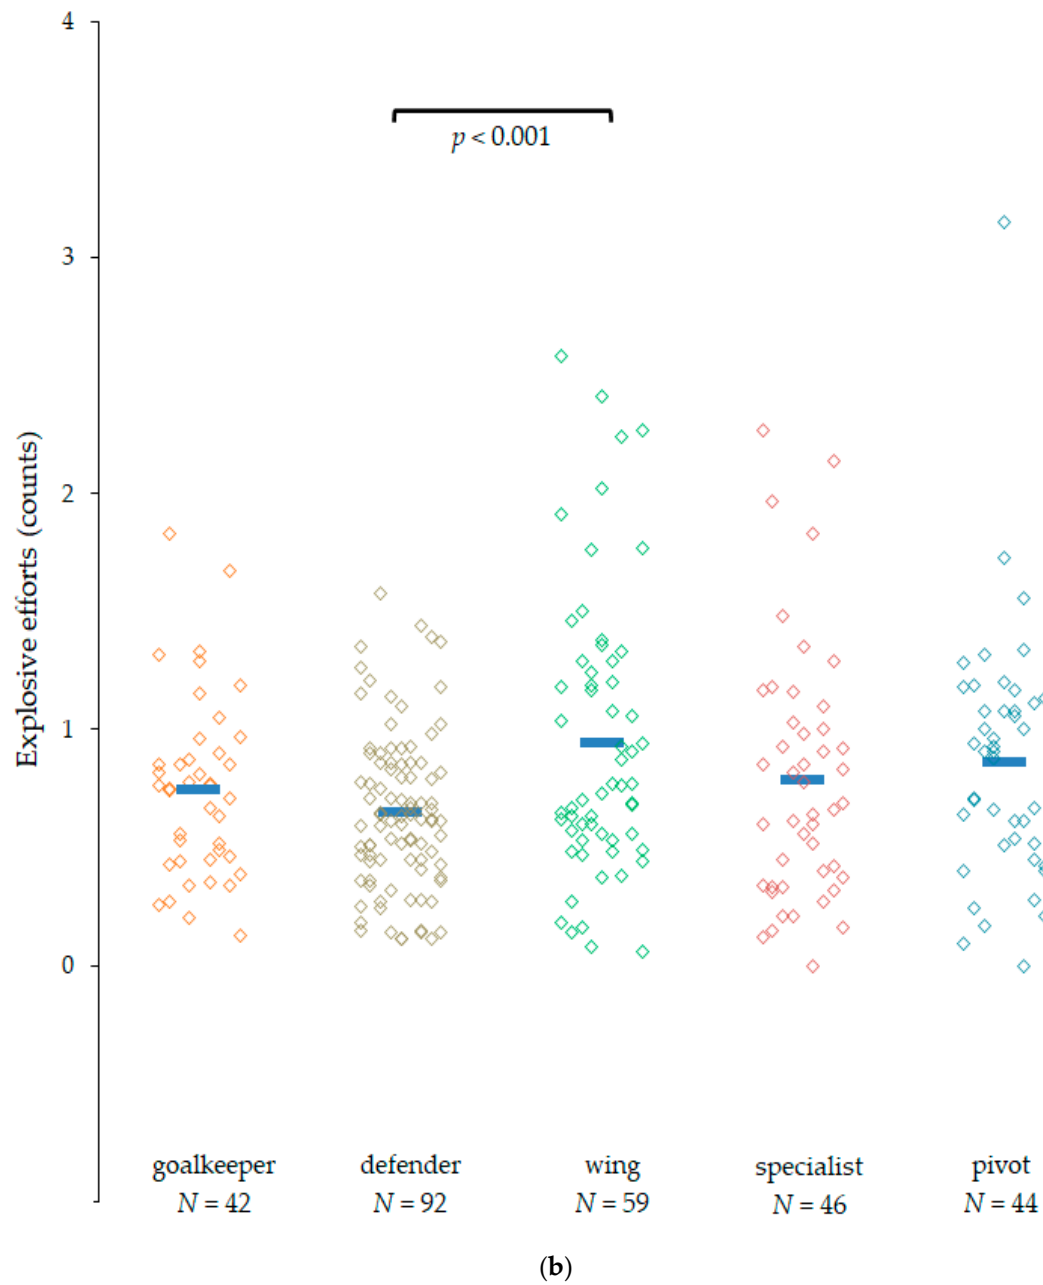

**Figure S5.** Explosive efforts per minute (counts) across the subgroups: (a) subgroup 1 (age/sex); (b) subgroup 2 (playing position).

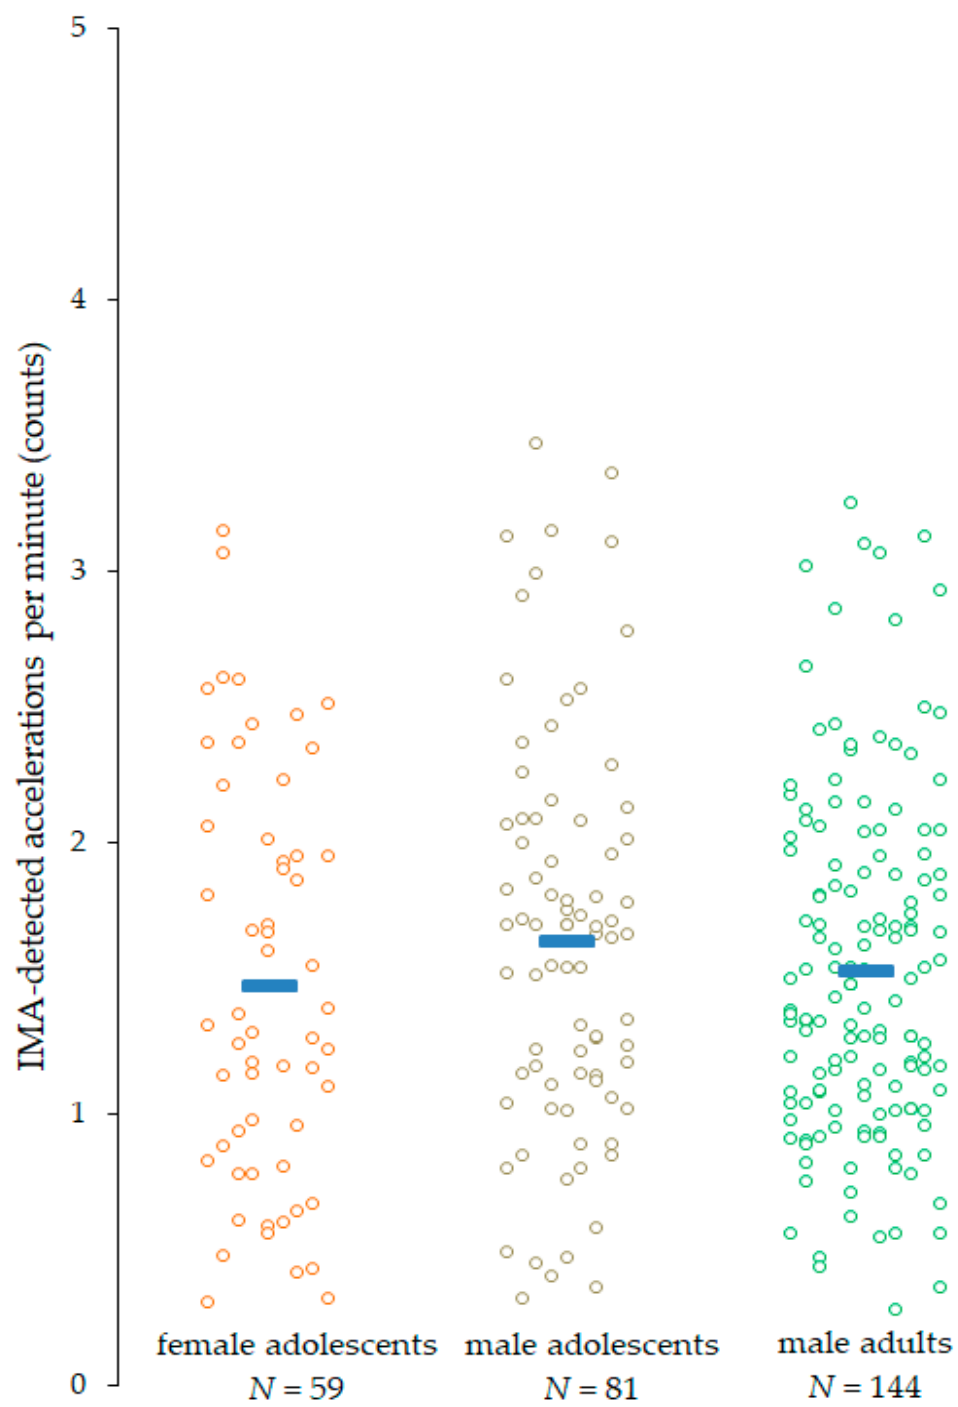

(a)

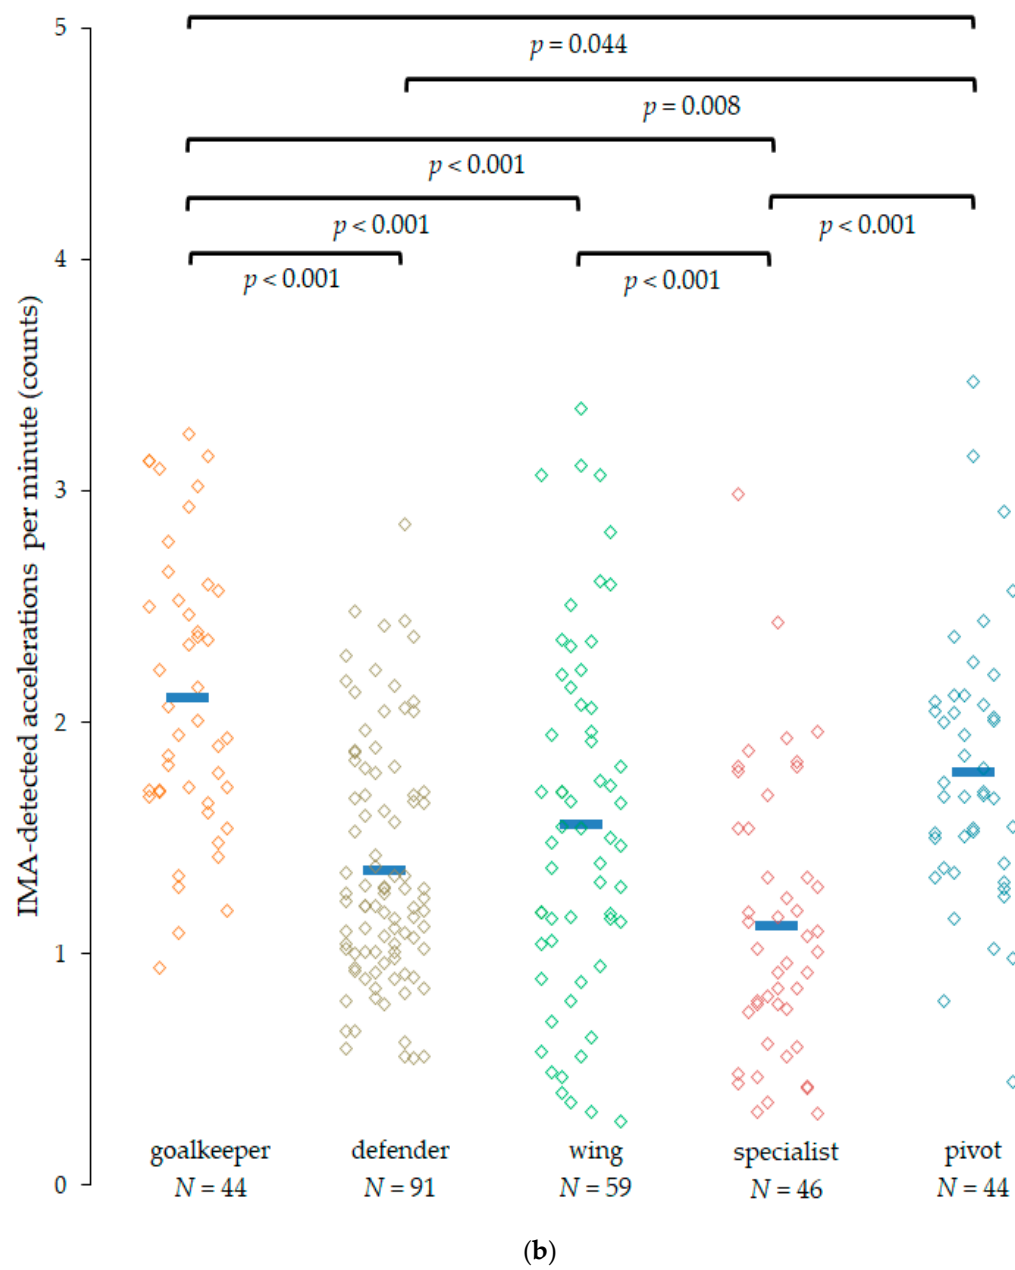

**Figure S6.** IMA-detected accelerations per minute (counts) across the subgroups: (a) subgroup 1 (age/sex); (b) subgroup 2 (playing position).

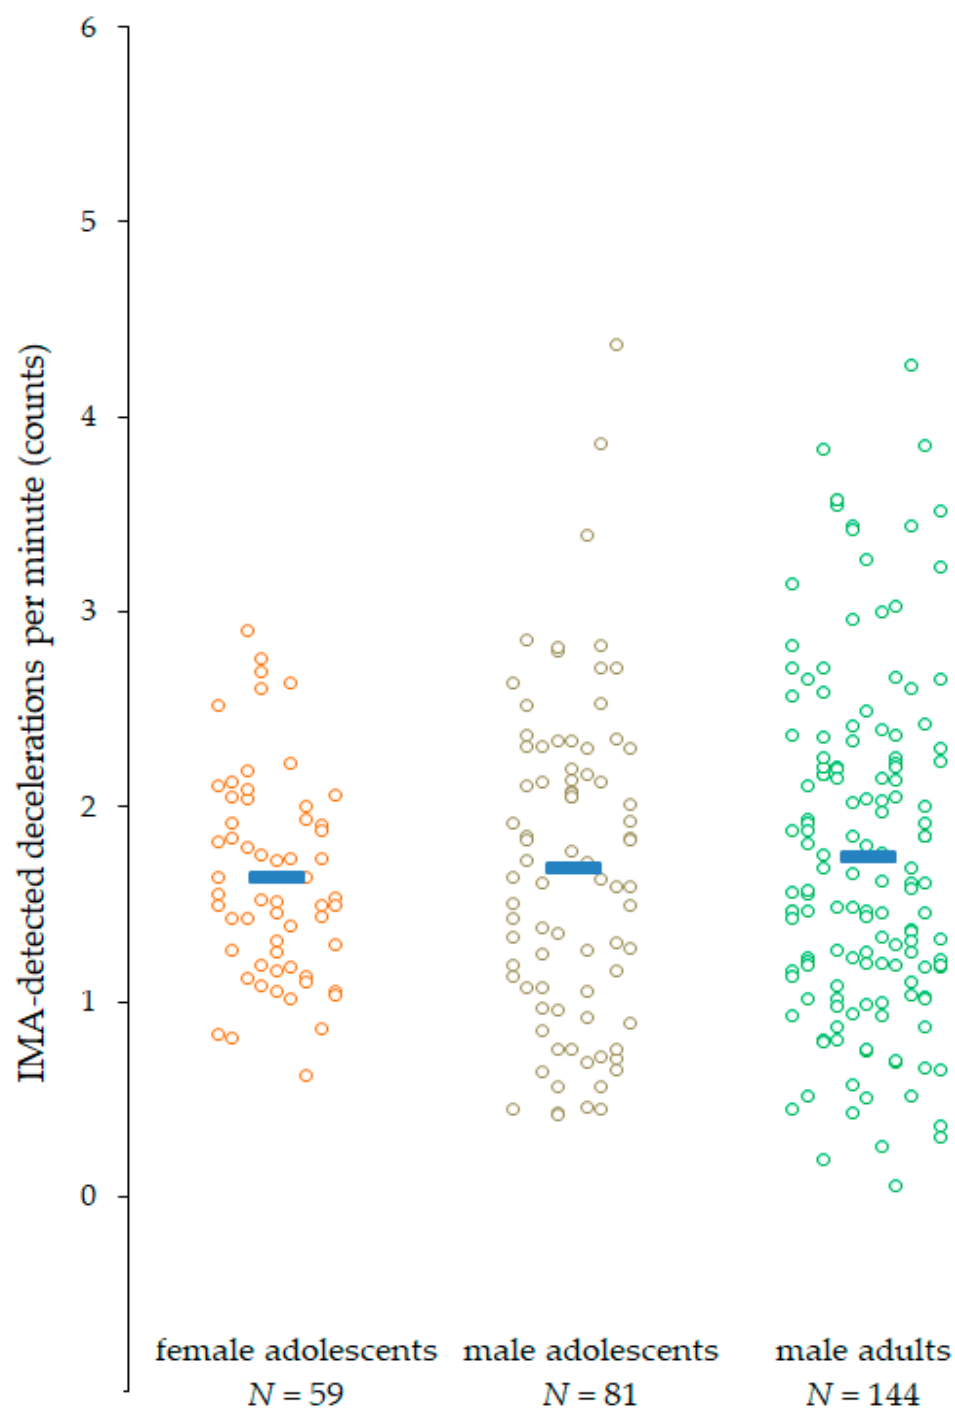

(a)

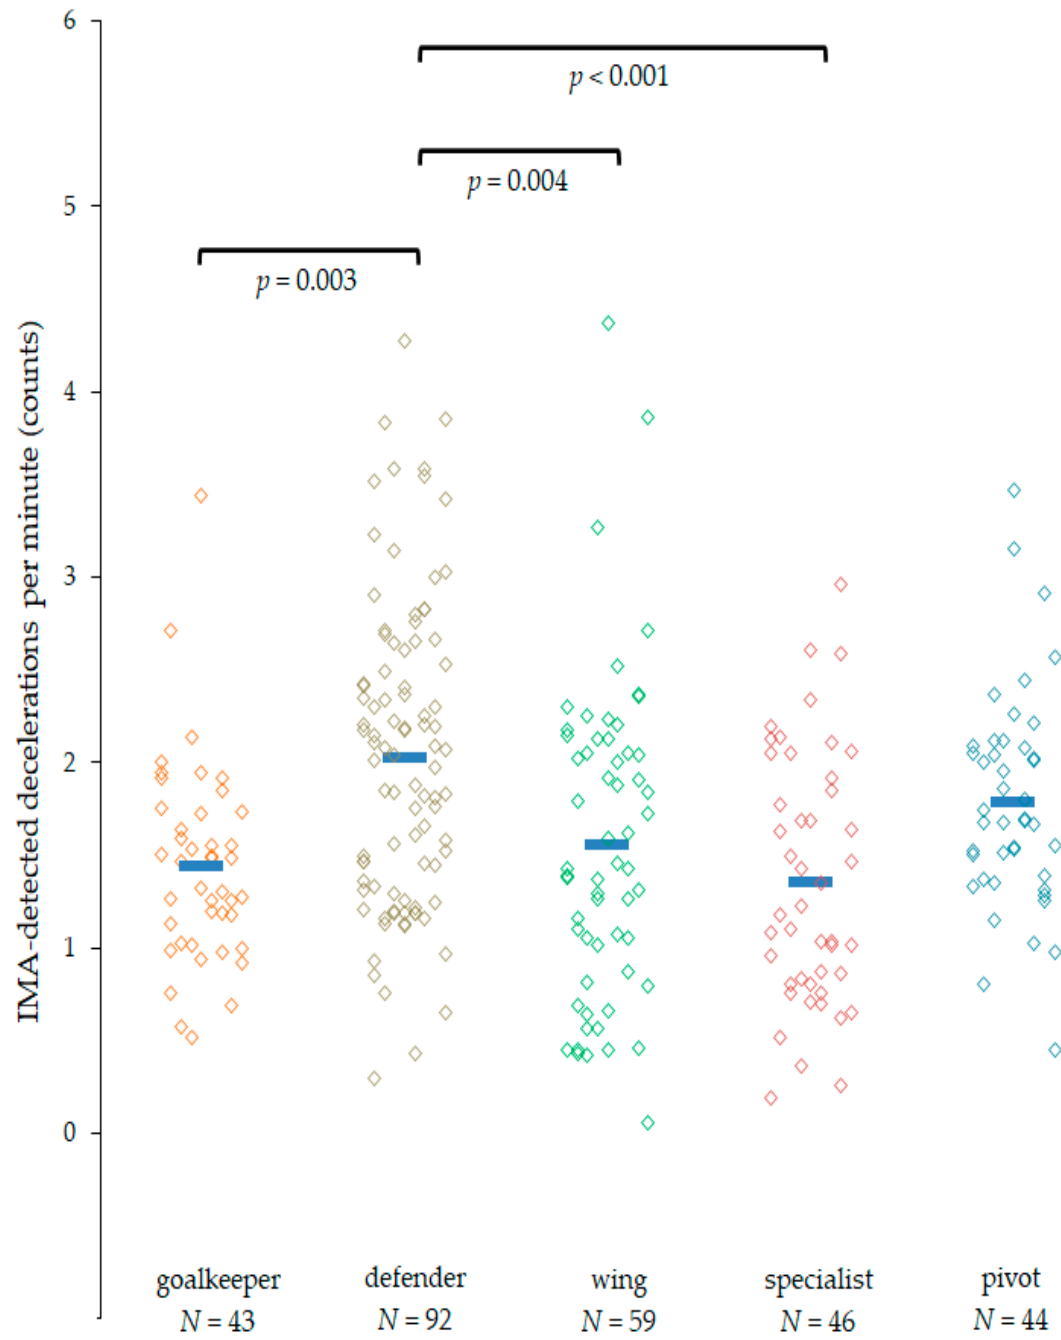

(b)

**Figure S7.** IMA-detected decelerations per minute (counts) across the subgroups: (a) subgroup 1 (age/sex); (b) subgroup 2 (playing position).

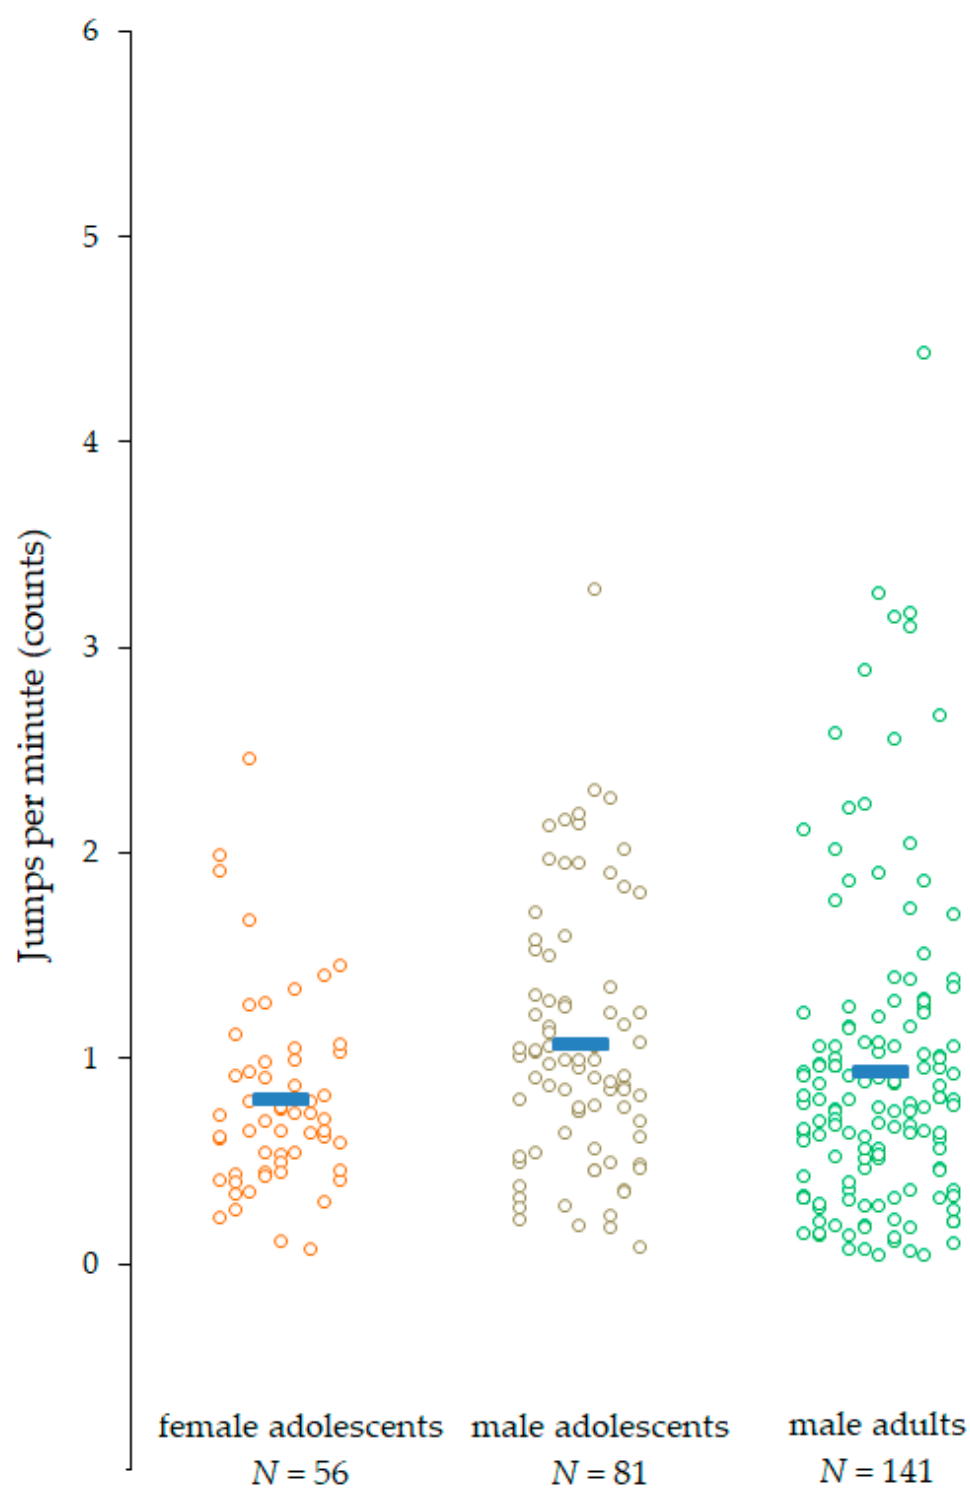

(a)

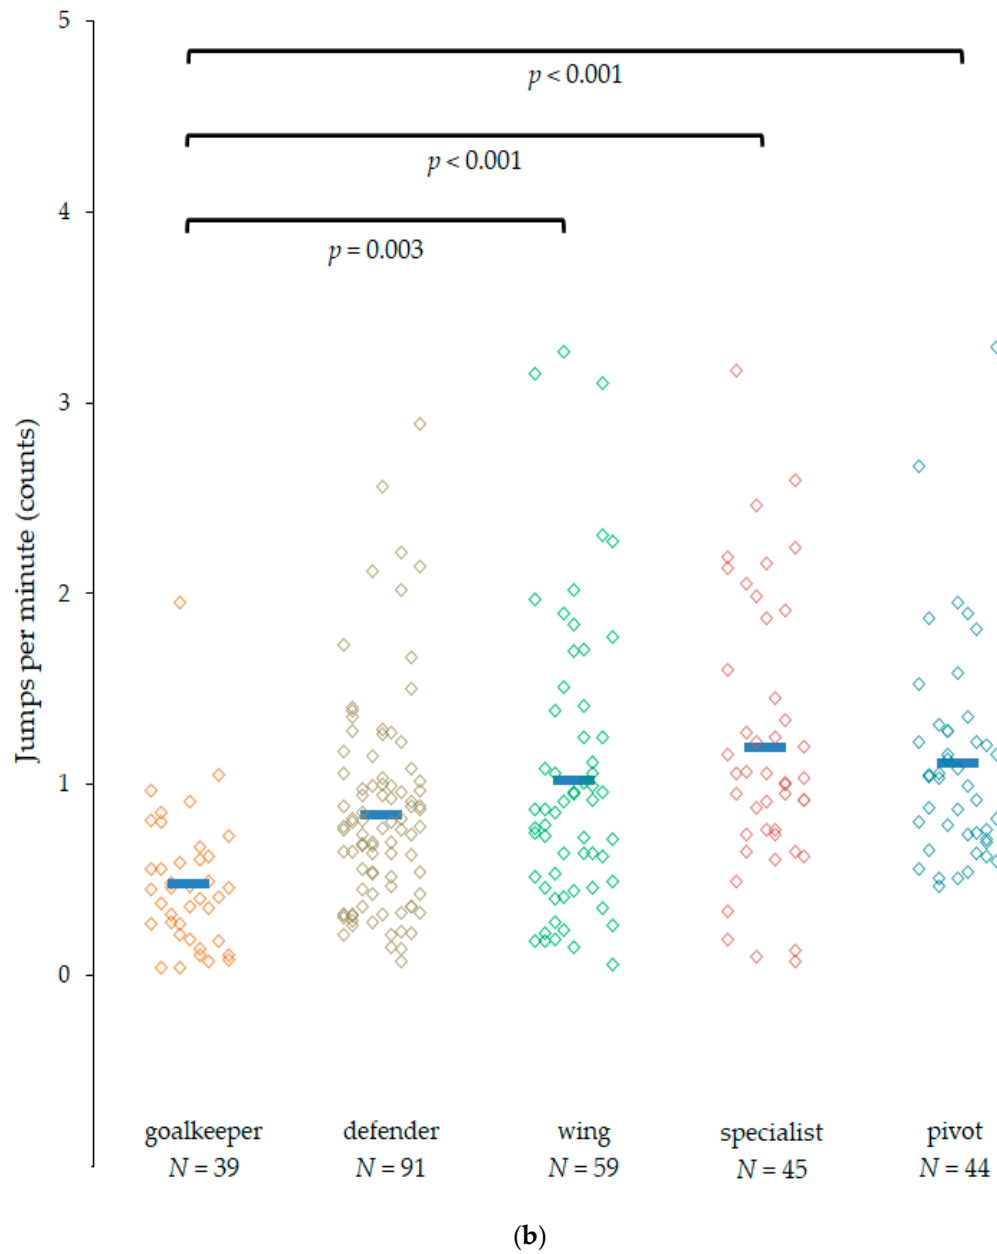

**Figure S8.** Jumps per minute (counts) across the subgroups: (a) subgroup 1 (age/sex); (b) subgroup 2 (playing position).
